# Supplementary material
Source: PubMed Central journal article supplement (PMC4050573)
Supplement: 1322282111_pnas.201322282SI.pdf [file 1322282111_pnas.201322282SI.pdf]

# Supporting Information

Garratt et al. 10.1073/pnas.1322282111

## SI Materials and Methods

**Experimental Procedures.** After a 2-wk habituation period in experimental cages (53 × 35 × 18 cm), during which males were singly housed, males of each genotype (*Sod1*<sup>+/+</sup>, *Sod1*<sup>+/-</sup>, *Sod1*<sup>-/-</sup>) were randomly allocated to two experimental groups that had their social environment manipulated in one of two ways over a 3-wk period: one group of males were exposed to the presence and odor of male and female conspecifics to induce investment in territory defense (termed “territorial”; *Sod1*<sup>-/-</sup> *n* = 6; *Sod1*<sup>+/-</sup> *n* = 8; *Sod1*<sup>+/+</sup> *n* = 8), but the other were not (controls; *Sod1*<sup>-/-</sup> *n* = 7; *Sod1*<sup>+/-</sup> *n* = 10; *Sod1*<sup>+/+</sup> *n* = 8). These manipulations were based on a previously published approach (1). Territorial males were exposed four times a week for a 2-h period to either the presence of a male or female (sex was alternated at each exposure); animals were presented behind a mesh barrier that inhibited direct contact. All disturbances associated with these manipulations (e.g., by the experimenter opening cages to add animals) were mimicked in control animals, but keeping the space behind the mesh barrier partition empty. Twice weekly territorial males also received a small handful of female substrate and nesting material in their cage. Control males had an equal amount of their own substrate and nesting material added to their cage. Finally, each male’s cage contained four small painted metal tiles, which preliminary experiments revealed males would readily scent-mark. Three times per week territorial males had their tiles swapped with a separate set of tiles that had been kept in the cage of a CBA male, thus simulating the presence of intruder scent-marks within their territory. The tiles of control males were rotated randomly within their own cage to control for the disturbance.

**Mitochondrial Bioenergetics.** Preparation of permeabilized livers were conducted at 4 °C as described elsewhere (2). After permeabilization, the samples were blotted and weighed using a Sartorius CP2P Electronic Micro Precision Balance (Sartorius). All measurements were performed at 37 °C using an Oxygraph-2K respirometer (Oroboros Instruments). The different respiration rates measured are presented with the abbreviations of the complexes involved followed by the state of respiration (complex-STATE) and a typical graph of oxygen consumption (in pmol·s<sup>-1</sup>·mg<sup>-1</sup> of permeabilized liver) is presented in Fig. 4A. Malate (2 mM) and Palmitoyl Carnitine (50 μM) were injected into the oxygraph chambers and the samples were transferred shortly thereafter. This process allowed the measurement of the

Leak state during β-oxidation (ETF+CI-Leak) by providing electrons to the electron transport flavoprotein (ETF) and to complex I (CI). This state is a resting state of nonphosphorylating respiration when oxygen flux is maintained mainly to compensate for the proton leak. Injection of excess ADP (5 mM) allowed it to reach a state of OXPHOS for ETF (ETF+CI-OXPHOS). This reaction enables measurement of the maximum oxygen flux when the transport of electrons from ETF is coupled to the production of ATP. Subsequent injection of cytochrome *c* from equine heart (15 μM) allowed evaluation of the functional integrity of the outer mitochondrial membrane (ETF+CIc-OXPHOS): if less than a 5% increase in oxygen consumption was observed, the sample had an intact outer mitochondrial membrane and was therefore used for the rest of the experiment. Additional O<sub>2</sub> fluxes were then determined by sequentially injecting different compounds: glutamate and pyruvate (10 mM each) to monitor the maximum contribution of complex I during the OXPHOS state (CIc+ETF-OXPHOS); succinate (10 mM) to monitor maximum OXPHOS state (CIc+CII+ETF-OXPHOS) with convergent electron flow from complex I, complex II and ETF; FCCP (optimum concentration reached between 1.00 and 1.25 μM) to stimulate uncoupled respiration for complex I, complex II, and ETF as a measure of electron transport system (ETS) capacity (CIc+CII+ETF-ETS); rotenone (1 μM), which is an inhibitor of complex I, allowed us to measure the oxygen flux of electron input through complex II in the uncoupled state (CII-ETS); and antimycin A (2.5 μM), inhibitor of complex III to measure residual oxygen consumption. The inhibition of complex III by antimycin A allowed us to measure the residual oxygen consumption because of residual oxidative side reactions occurring in permeabilized livers and to correct all of the O<sub>2</sub> fluxes. Finally, complex IV (CIV) activity was measured after inhibition of complexes I and III, by injecting *N,N,N',N'*-tetramethyl-*p*-phenylenediamine (TMPD) and ascorbate (0.5 μM and 2 mM respectively) into the chambers. Because of autoxidation of TMPD, ascorbate, and cytochrome *c*, chemical backgrounds were evaluated at the end of each experiment after inhibition of CIV and were subtracted from the activity. All measurements were expressed as means of respiration rates expressed in picomole of oxygen consumed per second per milligram of permeabilized livers ± SEM or in picomole of oxygen consumed per unit of citrate synthase. Citrate synthase activity was determined by following the increase in absorbance because of the reduction of DTNB at 412 nm.

1. Garratt M, et al. (2012) Tissue-dependent changes in oxidative damage with male reproductive effort in house mice. *Funct Ecol* 26(2):423–433.

2. Pichaud N, Garratt M, Ballard JWO, Brooks RC (2013) Physiological adaptations to reproduction. II. Mitochondrial adjustments in livers of lactating mice. *J Exp Biol* 216(Pt 15): 2889–2895.



**Table S2. Univariate tests exploring the effects of SOD1 deficiency, investment in sexual signaling, and the interaction between these treatments on measures of oxidative stress in the liver and gastrocnemius muscle**

| Source and dependent variable    | Univariate tests |       |        |
|----------------------------------|------------------|-------|--------|
|                                  | Df               | F     | P      |
| <b>Genotype</b>                  |                  |       |        |
| GSH (liver)                      | 2, 41            | 3.69  | 0.034  |
| GSSH (liver)                     | 2, 41            | 5.96  | 0.005  |
| Aconitase (liver)                | 2, 40            | 14.72 | <0.001 |
| Protein thiols (liver)           | 2, 40            | 1.35  | 0.27   |
| MDA (liver)                      | 2, 36            | 1.19  | 0.32   |
| Aconitase (gastrocnemius muscle) | 2, 41            | 1.28  | 0.29   |
| MDA (gastrocnemius muscle)       | 2, 37            | 2.81  | 0.073  |
| <b>Environment</b>               |                  |       |        |
| GSH (liver)                      | 1, 41            | 2.29  | 0.14   |
| GSSH (liver)                     | 1, 41            | 0.57  | 0.45   |
| Aconitase (liver)                | 1, 40            | 0.27  | 0.61   |
| Protein thiols (liver)           | 1, 40            | 0.27  | 0.61   |
| MDA (liver)                      | 1, 37            | 2.44  | 0.13   |
| Aconitase (gastrocnemius muscle) | 1, 41            | 0.11  | 0.74   |
| MDA (gastrocnemius muscle)       | 1, 38            | 4.11  | 0.050  |
| <b>Genotype × Environment</b>    |                  |       |        |
| GSH (liver)                      | 2, 41            | 1.19  | 0.31   |
| GSSH (liver)                     | 2, 41            | 0.12  | 0.89   |
| Aconitase (liver)                | 2, 40            | 2.04  | 0.14   |
| Protein thiols (liver)           | 2, 40            | 2.95  | 0.064  |
| MDA (liver)                      | 2, 36            | 0.14  | 0.87   |
| Aconitase (gastrocnemius muscle) | 2, 41            | 0.91  | 0.41   |
| MDA (gastrocnemius muscle)       | 2, 37            | 2.61  | 0.055  |

**Table S3. Effect of genotype and environment on body mass, oxygen consumption (O<sub>2</sub> mL/h), and heat production (KCAL/h)**

|                                      | Genotype |      |       | Environment |       |       | Genotype × Environment |      |       | Body mass |      |      |
|--------------------------------------|----------|------|-------|-------------|-------|-------|------------------------|------|-------|-----------|------|------|
|                                      | df       | F    | P     | df          | F     | P     | df                     | F    | P     | df        | F    | P    |
| Body mass                            | 2, 40    | 5.48 | 0.008 | 1, 40       | 11.57 | 0.002 | 2, 40                  | 2.89 | 0.067 | —         | —    | —    |
| Metabolic rate (including body mass) | 2, 35    | 3.63 | 0.037 | 1, 35.1     | 1.21  | 0.28  | 2, 35.1                | 0.79 | 0.46  | 1, 35     | 0.09 | 0.77 |
| Metabolic rate (body mass removed)   | 2, 39    | 3.47 | 0.041 | 1, 39.1     | 1.53  | 0.22  | 2, 39.1                | 0.9  | 0.42  | —         | —    | —    |
| Heat (including body mass)           | 2, 35    | 3.74 | 0.034 | 1, 35.2     | 1     | 0.32  | 2, 35.1                | 0.92 | 0.41  | 1, 35     | 0.04 | 0.95 |
| Heat (body mass removed)             | 2, 36.1  | 4.45 | 0.019 | 1, 36.1     | 1.43  | 0.24  | 2, 36.1                | 1.19 | 0.32  | —         | —    | —    |

Respiration parameters are presented both with body mass added as a covariate and without. Body mass was dropped from the final model in both cases as it did not predict either variable.

**Table S4. Effect of genotype and environment on measures of bioenergetic respiratory capacity**

| Variable                                     | Genotype     |              |                  | Environment  |             |              | Genotype × Environment |             |              |
|----------------------------------------------|--------------|--------------|------------------|--------------|-------------|--------------|------------------------|-------------|--------------|
|                                              | df           | F            | P                | df           | F           | P            | df                     | F           | P            |
| Respiration per gram of permeabilized tissue |              |              |                  |              |             |              |                        |             |              |
| ETF+CI LEAK                                  | <b>40.10</b> | <b>10.62</b> | <b>&lt;0.001</b> | 40.08        | 1.84        | 0.180        | 40.07                  | 0.51        | 0.610        |
| ETF+CI OXPHOS                                | <b>40.01</b> | <b>10.85</b> | <b>&lt;0.001</b> | 40.06        | 1.36        | 0.250        | 40.05                  | 0.54        | 0.590        |
| Clc+ETF OXPHOS                               | <b>40.01</b> | <b>2.95</b>  | <b>0.064</b>     | <b>40.02</b> | <b>5.59</b> | <b>0.023</b> | 40.02                  | 0.37        | 0.690        |
| Clc+CII+ETF OXPHOS                           | <b>40.01</b> | <b>4.38</b>  | <b>0.019</b>     | <b>40.03</b> | <b>7.50</b> | <b>0.009</b> | 40.03                  | 0.56        | 0.570        |
| Clc+CII+ETF ETS                              | <b>40.01</b> | <b>2.77</b>  | <b>0.075</b>     | <b>40.04</b> | <b>5.21</b> | <b>0.028</b> | 40.04                  | 0.86        | 0.430        |
| CII-ETS                                      | 40.03        | 0.40         | 0.670            | 40.21        | 2.26        | 0.140        | <b>40.19</b>           | <b>2.76</b> | <b>0.075</b> |
| CIV                                          | 41.00        | 0.98         | 0.390            | 41.00        | 0.52        | 0.480        | 41.00                  | 0.45        | 0.640        |
| Citrate synthase activity                    | <b>40.05</b> | <b>8.25</b>  | <b>0.001</b>     | 40.32        | 0.01        | 0.96         | 40.29                  | 0.69        | 0.51         |
| Respiration/citrate synthase activity        |              |              |                  |              |             |              |                        |             |              |
| ETF+CI LEAK                                  | 40.01        | 0.98         | 0.38             | 40.09        | 0.05        | 0.83         | 40.08                  | 0.26        | 0.78         |
| ETF+CI OXPHOS                                | 40.01        | 1.02         | 0.37             | 40.07        | 0.01        | 0.93         | 40.06                  | 0.19        | 0.83         |
| Clc+ETF OXPHOS                               | 40.01        | 0.26         | 0.77             | 40.02        | 2.16        | 0.15         | 40.02                  | 0.5         | 0.61         |
| Clc+CII+ETF OXPHOS                           | 40.01        | 0.97         | 0.39             | 40.05        | 1.87        | 0.18         | 40.04                  | 0.62        | 0.54         |
| Clc+CII+ETF ETS                              | 40.01        | 1.05         | 0.36             | 40.05        | 1.12        | 0.3          | 40.04                  | 0.65        | 0.53         |
| CII-ETS                                      | <b>40.02</b> | <b>3.23</b>  | <b>0.050</b>     | 40.16        | 1.26        | 0.27         | <b>40.14</b>           | <b>2.89</b> | <b>0.067</b> |
| CIV                                          | 40.04        | 1.19         | 0.31             | 40.26        | <0.01       | 0.99         | 40.23                  | 0.1         | 0.91         |
| Ratio of complexes                           |              |              |                  |              |             |              |                        |             |              |
| ETF+CI OXPHOS/CII-ETS                        | <b>40.03</b> | <b>10.19</b> | <b>&lt;0.001</b> | 40.18        | 0.03        | 0.87         | <b>40.17</b>           | <b>3.18</b> | <b>0.052</b> |
| Clc+ETF OXPHOS/CII-ETS                       | <b>40.01</b> | <b>3.63</b>  | <b>0.036</b>     | <b>40.03</b> | <b>2.9</b>  | <b>0.098</b> | 40.03                  | 1.13        | 0.33         |
| Clc+ETF OXPHOS/Clc+CII+ETF OXPHOS            | 40.01        | 0.98         | 0.39             | 40.04        | 0.75        | 0.39         | 40.04                  | 0.03        | 0.97         |
| CII-ETS/Clc+CII+ETF OXPHOS                   | <b>40.02</b> | <b>3.36</b>  | <b>0.045</b>     | 40.14        | 0.17        | 0.68         | 40.13                  | 0.95        | 0.37         |

Test statistics are derived from general linear mixed models on individual bioenergetic parameters. Boldface entries denote results with a value of  $P < 0.1$ .

## Other Supporting Information Files

[Dataset S1 \(DOC\)](#)
